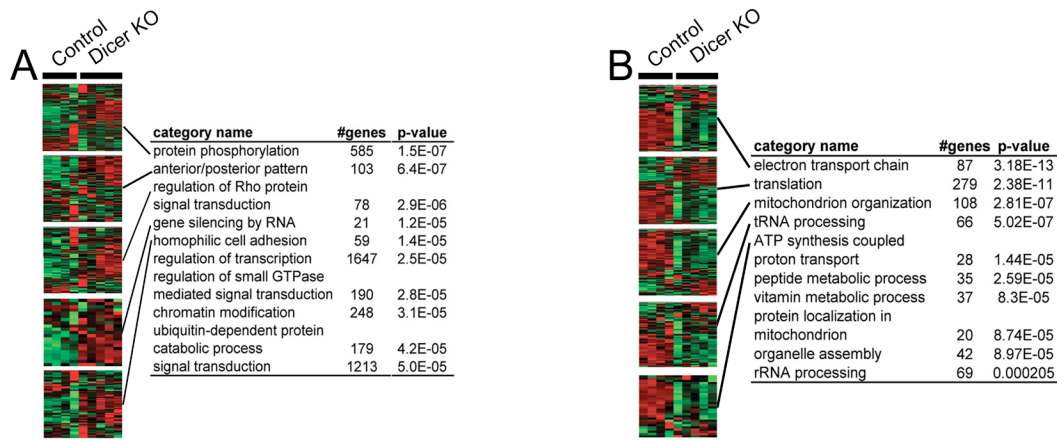

**C Downregulated genes**

| Ensembl Gene ID     | Description                                                                                            | Associated Gene Name | log2       | FDR        |
|---------------------|--------------------------------------------------------------------------------------------------------|----------------------|------------|------------|
| ENSMUSG00000026227  | RIKEN cDNA 2810459M1.1 gene Gene [Source:MGI Symbol;Acc:MGI:1920042]                                   | 2810459M1.1Rik       | -1.4857009 | 0.0332855  |
| ENSMUSG00000059325  | HOP homeobox Gene [Source:MGI (curated);Acc:MGI:1916782]                                               | Hopx                 | -1.2917070 | 0.00560871 |
| ENSMUSG00000004892  | brevican Gene [Source:MGI Symbol;Acc:MGI:1096385]                                                      | Bcan                 | -1.2824554 | 0.0486312  |
| ENSMUSG000000062345 | serine (or cysteine) peptidase inhibitor, clade B, member 2 Gene [Source:MGI (curated);Acc:MGI:97609]  | Serpinh2             | -1.150748  | 0.00243955 |
| ENSMUSG000000045257 | MORN repeat containing 2 Gene [Source:MGI Symbol;Acc:MGI:2674071]                                      | Morn2                | -1.1392899 | 0.00644425 |
| ENSMUSG000000035642 | RIKEN cDNA 1810020D17.7 gene Gene [Source:MGI Symbol;Acc:MGI:1913523]                                  | 1810020D17Rik        | -1.0959095 | 0.00340925 |
| ENSMUSG000000068205 | MACRO domain containing 2 Gene [Source:MGI (curated);Acc:MGI:1920149]                                  | Macro2d              | -1.0710821 | 0.00237502 |
| ENSMUSG000000070394 | RIKEN cDNA 1810027O10.0 gene Gene [Source:MGI Symbol;Acc:MGI:1916436]                                  | 1810027O10Rik        | -1.0336299 | 0.00645658 |
| ENSMUSG000000042198 | coiled-coil-helix-coiled-coil-helix domain containing 7 Gene [Source:MGI (curated);Acc:MGI:1913683]    | Chchd7               | -1.0225972 | 0.00513    |
| ENSMUSG000000041718 | asparagine-linked glycosylation 13 homolog (S. cerevisiae) Gene [Source:MGI (curated);Acc:MGI:1914824] | Alg13                | -1.0084264 | 0.00434832 |
| ENSMUSG000000019761 | keratin 10 Gene [Source:MGI (curated);Acc:MGI:96685]                                                   | Krt10                | -1.0062412 | 0.00252591 |

**Upregulated genes**

| Ensembl Gene ID      | Description                                                                                                               | Associated Gene Name | log2       | FDR       |
|----------------------|---------------------------------------------------------------------------------------------------------------------------|----------------------|------------|-----------|
| ENSMUSG000000050240  | hypermethylated in cancer 2 Gene [Source:MGI Symbol;Acc:MGI:1929869]                                                      | Hic2                 | 1.01787592 | 0.0048853 |
| ENSMUSG000000024642  | transducin-like enhancer of split 4, homolog of Drosophila E(spl) Gene [Source:MGI Symbol;Acc:MGI:104633]                 | Tie4                 | 1.04046809 | 0.0015253 |
| ENSMUSG000000036279  | POU domain, class 2, transcription factor 1 Gene [Source:MGI (curated);Acc:MGI:101898]                                    | AC120871.2           | 1.04080651 | 0.0071940 |
| ENSMUSG000000057098  | early B-cell factor 1 Gene [Source:MGI (curated);Acc:MGI:95275]                                                           | Ebf1                 | 1.04404118 | 0.0019040 |
| ENSMUSG000000028364  | tenascin C Gene [Source:MGI (curated);Acc:MGI:101922]                                                                     | Tnc                  | 1.0449761  | 0.014687  |
| ENSMUSG000000022483  | collagen, type II, alpha 1 Gene [Source:MGI (curated);Acc:MGI:88452]                                                      | Col2a1               | 1.05067295 | 0.013134  |
| ENSMUSG000000014592  | calmodulin binding transcription activator 1 Gene [Source:MGI (curated);Acc:MGI:2140230]                                  | Camta1               | 1.0510997  | 0.0063325 |
| ENSMUSG000000043753  | doublesex and mab-3 related transcription factor like family A1 Gene [Source:MGI (curated);Acc:MGI:2653627]               | Dmrt1a               | 1.05503611 | 0.0018790 |
| ENSMUSG000000052105  | RIKEN cDNA 1110012J17.7 gene Gene [Source:MGI Symbol;Acc:MGI:1915867]                                                     | 1110012J17Rik        | 1.06303596 | 0.0028119 |
| ENSMUSG000000019230  | LM homeobox protein 9 Gene [Source:MGI (curated);Acc:MGI:1316721]                                                         | Lhx9                 | 1.07297162 | 0.0034404 |
| ENSMUSG000000026365  | POU domain, class 2, transcription factor 1 Gene [Source:MGI (curated);Acc:MGI:101898]                                    | Pou2f1               | 1.0911457  | 0.0024488 |
| ENSMUSG000000068740  | cadherin, EGF LAG seven-pass G-type receptor 2 (flamingo homolog, Drosophila) Gene [Source:MGI (curated);Acc:MGI:1858235] | Celsr2               | 1.09662841 | 0.0041055 |
| ENSMUSG000000030494  | rhophilin, Rho GTPase binding protein 2 Gene [Source:MGI (curated);Acc:MGI:1289234]                                       | Rhpn2                | 1.10353949 | 0.0011148 |
| ENSMUSG000000061393  | activin receptor IIB Gene [Source:MGI Symbol;Acc:MGI:87912]                                                               | Acrv2b               | 1.1067165  | 0.0023734 |
| ENSMUSG000000038718  | pre B-cell leukemia transcription factor 3 Gene [Source:MGI (curated);Acc:MGI:97496]                                      | Pbx3                 | 1.10773954 | 0.023161  |
| ENSMUSG000000033581  | insulin-like growth factor 2 mRNA binding protein 2 Gene [Source:MGI (curated);Acc:MGI:1890358]                           | Igf2bp2              | 1.12862099 | 0.0073122 |
| ENSMUSG000000073019  | Putative uncharacterized protein [Source:UniProtKB/TrEMBL;Acc:Q3UHE8]                                                     | AL669964.2           | 1.13430238 | 0.0014193 |
| ENSMUSG000000009418  | neuron navigator 1 Gene [Source:MGI Symbol;Acc:MGI:2183683]                                                               | Nav1                 | 1.13450356 | 0.0081533 |
| ENSMUSG000000029238  | circadian locomotor output cycles kaput Gene [Source:MGI Symbol;Acc:MGI:99698]                                            | Clock                | 1.13611199 | 0.0026813 |
| ENSMUSG000000029193  | cholecystokinin A receptor Gene [Source:MGI Symbol;Acc:MGI:99478]                                                         | Cckar                | 1.13784167 | 0.0081569 |
| ENSMUSG000000066440  | zinc finger, FYVE domain containing 26 Gene [Source:MGI Symbol;Acc:MGI:1924767]                                           | Zfyve26              | 1.15225607 | 0.0044533 |
| ENSMUSG000000028527  | adenylate kinase 4 Gene [Source:MGI (curated);Acc:MGI:87979]                                                              | Ak3l1                | 1.15663948 | 0.0023365 |
| ENSMUSG000000048562  | trans-acting transcription factor 8 Gene [Source:MGI Symbol;Acc:MGI:2443471]                                              | Sp8                  | 1.16568607 | 0.0022085 |
| ENSMUSG000000039830  | oligodendrocyte transcription factor 2 Gene [Source:MGI (curated);Acc:MGI:1355331]                                        | Olig2                | 1.16628652 | 0.038565  |
| ENSMUSG000000038872  | zinc finger homeobox 3 Gene [Source:MGI Symbol;Acc:MGI:99948]                                                             | Zfhx3                | 1.17879595 | 0.011001  |
| ENSMUSG000000073202  | Putative uncharacterized protein [Source:UniProtKB/TrEMBL;Acc:Q3TDD0]                                                     | AC158586.1           | 1.1822875  | 0.0084865 |
| ENSMUSG000000017453  | pipecolic acid oxidase Gene [Source:MGI (curated);Acc:MGI:1197006]                                                        | Pipox                | 1.23898109 | 0.0016235 |
| ENSMUSG000000050558  | prokinectin receptor 2 Gene [Source:MGI (curated);Acc:MGI:2181363]                                                        | Prokr2               | 1.25049806 | 0.040107  |
| ENSMUSG000000035834  | polymerase (RNA) III (DNA directed) polypeptide G Gene [Source:MGI Symbol;Acc:MGI:1914736]                                | Polr3g               | 1.25318266 | 0.0033569 |
| ENSMUSG000000029714  | GRB10 interacting GYF protein 1 Gene [Source:MGI Symbol;Acc:MGI:1888677]                                                  | Gygf1                | 1.25498525 | 0.0029667 |
| ENSMUSG000000025571  | trinucleotide repeat containing 6C Gene [Source:MGI (curated);Acc:MGI:2443265]                                            | Trnrc6c              | 1.25694333 | 0.0025115 |
| ENSMUSG000000000214  | tyrosine hydroxylase Gene [Source:MGI (curated);Acc:MGI:98735]                                                            | Th                   | 1.25905654 | 0.0075223 |
| ENSMUSG000000006205  | Htra serine peptidase 1 Gene [Source:MGI (curated);Acc:MGI:1929076]                                                       | Htra1                | 1.2922388  | 0.022002  |
| ENSMUSG000000074415  | RIKEN cDNA 2610203C20.0 gene Gene [Source:MGI Symbol;Acc:MGI:1917705]                                                     | 2610203C20Rik        | 1.29480563 | 0.0024315 |
| ENSMUSG0000000031762 | metallothionein 2 Gene [Source:MGI Symbol;Acc:MGI:97172]                                                                  | Mt2                  | 1.30157757 | 0.0062098 |
| ENSMUSG000000022708  | zinc finger and BTB domain containing 20 Gene [Source:MGI (curated);Acc:MGI:1929213]                                      | Zbtb20               | 1.30669793 | 0.0060576 |
| ENSMUSG000000013415  | insulin-like growth factor 2 mRNA binding protein 1 Gene [Source:MGI (curated);Acc:MGI:1890357]                           | Igf2bp1              | 1.30704626 | 0.0024119 |
| ENSMUSG0000000061762 | tachykinin 1 Gene [Source:MGI Symbol;Acc:MGI:98474]                                                                       | Tac1                 | 1.3214311  | 0.016411  |
| ENSMUSG000000049313  | sortilin-related receptor, LDLR class A repeats-containing Gene [Source:MGI (curated);Acc:MGI:1202296]                    | Sorl1                | 1.3322444  | 0.0072966 |
| ENSMUSG000000022054  | neurofilament, medium polypeptide Gene [Source:MGI (curated);Acc:MGI:97314]                                               | Nefm                 | 1.34915044 | 0.0086085 |
| ENSMUSG000000025241  | FYVE and coiled-coil domain containing 1 Gene [Source:MGI Symbol;Acc:MGI:107277]                                          | Fyco1                | 1.36460089 | 0.021586  |
| ENSMUSG000000027347  | RAS guanyl releasing protein 1 Gene [Source:MGI (curated);Acc:MGI:1314635]                                                | Rasgrp1              | 1.38439901 | 0.011016  |
| ENSMUSG000000025019  | ligand dependent nuclear receptor corepressor Gene [Source:MGI Symbol;Acc:MGI:2443930]                                    | Lncor                | 1.42571491 | 0.002951  |
| ENSMUSG000000029563  | forkhead box P2 Gene [Source:MGI (curated);Acc:MGI:2148705]                                                               | Foxp2                | 1.45595582 | 0.0090679 |
| ENSMUSG000000047888  | trinucleotide repeat containing 6b Gene [Source:MGI Symbol;Acc:MGI:2443730]                                               | Trnrc6b              | 1.52056734 | 0.0024994 |
| ENSMUSG000000022055  | neurofilament, light polypeptide Gene [Source:MGI (curated);Acc:MGI:97313]                                                | Nefl                 | 1.58024378 | 0.0084437 |
| ENSMUSG000000032394  | immunoglobulin superfamily, DCC subclass, member 3 Gene [Source:MGI Symbol;Acc:MGI:1202390]                               | Igdc3                | 1.582201   | 0.0030652 |
| ENSMUSG000000052707  | trinucleotide repeat containing 6a Gene [Source:MGI Symbol;Acc:MGI:2385292]                                               | Trnrc6a              | 1.65042927 | 0.002168  |
| ENSMUSG000000030729  | phosphoglucomutase 2-like 1 Gene [Source:MGI (curated);Acc:MGI:1918224]                                                   | Pgm2l1               | 1.91167672 | 0.0023632 |
| ENSMUSG000000075324  | fdgufin Gene [Source:MGI (curated);Acc:MGI:1890647]                                                                       | Fign                 | 1.91470256 | 0.0041970 |
| ENSMUSG000000029546  | UNC homeobox Gene [Source:MGI Symbol;Acc:MGI:108013]                                                                      | Uncx                 | 2.07100304 | 0.0013406 |

| Targeting miRNA | Cell type, Tissue                                  | Reference                                                    |
|-----------------|----------------------------------------------------|--------------------------------------------------------------|
| *1 miR-335      | human breast cancer metastasis                     | Tavazoie SF, Nature, 2008                                    |
| *2 miR-129      | human hematopoietic stem cells                     | Liao R, Cell Biochem, 2008                                   |
| *3 miR-17-3p    | mouse embryonal spinal chord                       | Chen JA, Neuron, 2011                                        |
| *4 miR-130      | human mesenchymal stem-cell-derived neuronal cells | Greco SJ, Proc Natl Acad Sci USA, 2007                       |
| *5 miR-21       | mouse splenic CD4+T cells                          | Murthy RG, Brain Behav Immun, 2008<br>Pan W, J Immunol, 2010 |

**Fig. S1. Gene Ontology (GO) categories and differentially expressed genes in embryonic neocortex of conditional *Dicer* knockout (*Dicer* KO) mice.** (A,B) Enrichment of high-ranking ( $P < 0.001$ ) and low-ranking ( $P = 0.001$ ) genes in GO categories (Prüfer et al., 2007) in the differentially expressed genes (upregulated, A; downregulated, B) in embryonic neocortex of conditional *Dicer* knockout (*Dicer* KO), using 1000 gene permutations and a cutoff of at least 20 annotated genes per GO category. (C) List of the 62 detected and annotated genes analyzed in *Dicer* KO samples, with a difference of more than twofold ( $\log_2$  scale) over control samples and false discovery rate (FDR)  $< 5\%$  [corresponding to  $P < 0.02198$  (Student's *t*-test)], normalized to mean 0 and standard deviation of 1. Asterisks and numbers indicate genes previously validated as miRNA targets (references listed in the bottom panel).

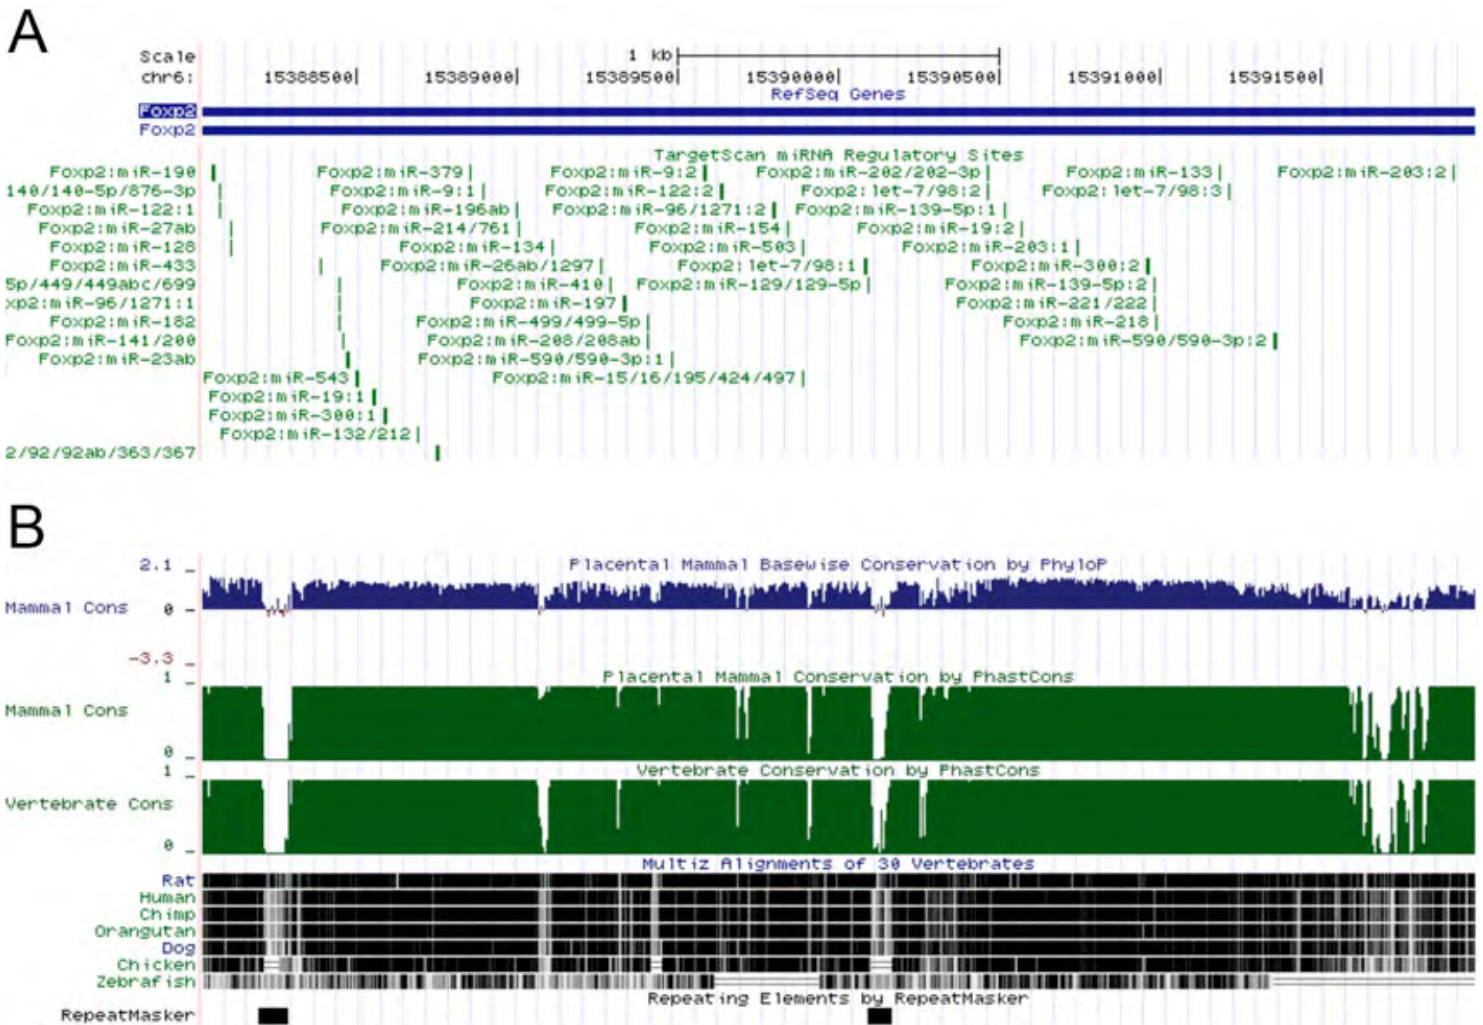

**Fig. S2. *Foxp2* 3' UTR is highly conserved in vertebrates and contains several predicted miRNA-binding sites. (A)** Higher magnification view of the 3' end of the mouse *Foxp2* gene showing the 3'UTR region (blue lines), miRNAs and their respective predicted binding sites in mouse *Foxp2* 3'UTR (green). **(B)** Conservation of *Foxp2* 3'UTR in placental mammals by PhyloP and Phastcons (blue and green, respectively), and in vertebrates by Phastcons (green); multiple alignment (black) of *Foxp2* 3'UTR region from various vertebrates (indicated in blue or green).

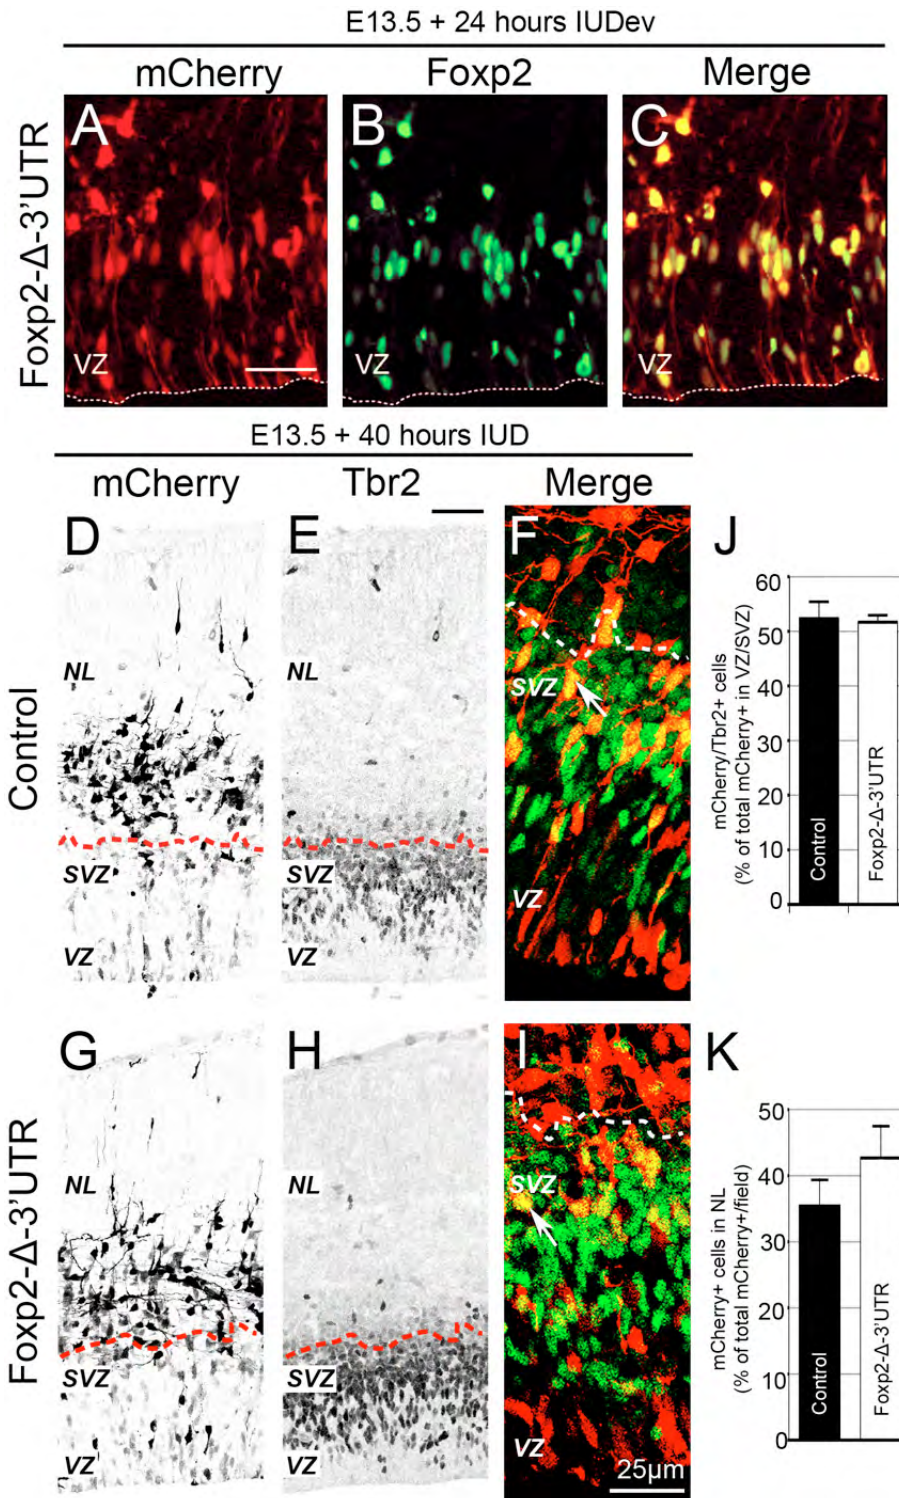

**Fig. S3. Ectopic expression of Foxp2 in neural progenitors does not impair their subtype specification and differentiation in embryonic neocortex.** (A-C) Fluorescence images from section through the dTel of E14.5 wild type (WT) mouse embryo co-electroporated *in utero* at E13.5 with pCAGGS-mCherry along with pCAGGS-Foxp2- $\Delta$ -3'UTR, illustrating intrinsic fluorescence of mCherry (A,C, red) and Foxp2 immunostaining (B,C, green). VZ, ventricular zone; dotted lines, edge of the lateral ventricle. Scale bar: 25  $\mu$ m. (D-I) Confocal images from sections through the telencephalon of E15 wild-type mouse embryo co-electroporated *in utero* at E13.5 with pCAGGS-mCherry and either pCAGGS-empty (control, D-F), or pCAGGS-Foxp2- $\Delta$ -3'UTR (Foxp2- $\Delta$ -3'UTR; G-I), showing intrinsic mCherry fluorescence (D,F,G,I) and Tbr2 immunostaining (E,F,H,I). Arrows indicate mCherry and Tbr2 double-positive cells. SVZ, sub-ventricular zone; NL, neuronal layers; dashed lines, top boundary of the SVZ. Scale bars: 100  $\mu$ m in D,E,G,H; 25  $\mu$ m in F,I). (J) Quantification of Tbr2 and mCherry double-positive progenitors (F,I, arrows) in the VZ and SVZ of cortices electroporated with control (black bar) or pCAGGS-Foxp2- $\Delta$ -3'UTR (white bar) plasmids, expressed as percentage of total mCherry-positive cells in VZ and SVZ per field (as shown in F-I). (K) Quantification of mCherry-positive neurons in NL of cortices electroporated with control (black bar) or pCAGGS-Foxp2- $\Delta$ -3'UTR (white bar) plasmids, and expressed as percentage of total mCherry-positive cells per field (as shown in D,G). Data are mean $\pm$ s.e.m. of at least three brains counted per condition (two or three sections along the rostrocaudal axis were counted per brain).

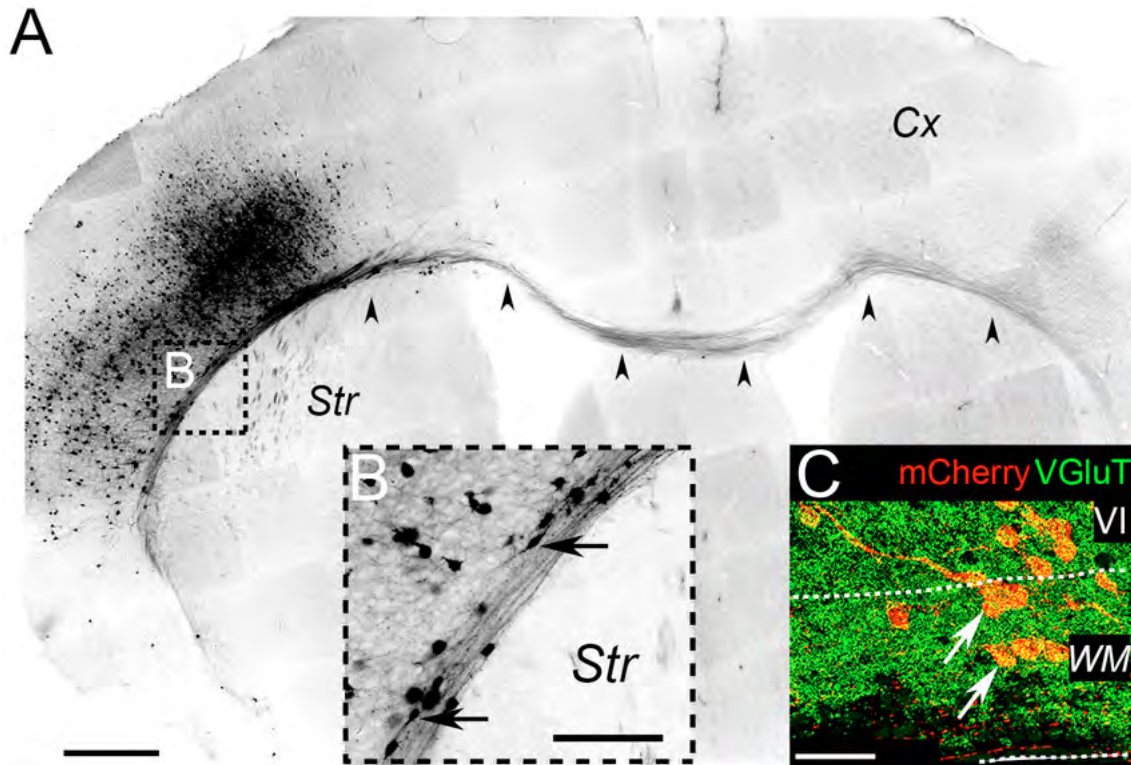

**Fig. S4. Ectopic expression of *Foxp2* does not impair cortical projection neuron differentiation.** (A-C) Fluorescence microscopy images of sections through the cerebral cortex of a wild-type (WT) P15 mouse, co-electroporated in utero at E13.5 with pCAGGS-mCherry and pCAGGS-*Foxp2*- $\Delta$ -3'UTR, showing intrinsic mCherry fluorescence (A,B, black; C, red) and vGluT immunostaining (C, green). Str, striatum; Cx, cortex; Dashed box in A indicates the region shown at higher magnification in B and a similar region shown in C. Arrowheads indicate fibers of electroporated cells innervating the contralateral cortex; black arrows indicate ectopic cells with tangential morphology extending neural processes; white arrows indicate mCherry and vGluT double-positive neurons. Scale bar: 500  $\mu$ m in A; 100  $\mu$ m in B; 50  $\mu$ m in C.

| <b>LNA-Probe Name</b>           | <b>Probe Sequence (5'&gt;3')</b>                                          |
|---------------------------------|---------------------------------------------------------------------------|
| Mmu-miR-132                     | CGACCATGGCTGTAGACTGTTA                                                    |
| Mmu-miR-9                       | TCATACAGCTAGATAACCAAAGA                                                   |
| <b>PCR primer Name</b>          | <b>Primer sequence (5'&gt;3', Cloning sites are shown in <b>bold</b>)</b> |
| Foxp2-3'UTR (first 2Kb) forward | CATCG <b>GAATTC</b> TTAGAACAATTACGGCAGA                                   |
| Foxp2-3'UTR (first 2Kb) reverse | GCAT <b>GAATTC</b> TTATTTGTA CTT CAGAAATGTAA                              |
| Foxp2-3'UTR (last 2Kb) forward  | ATGC <b>GAATTC</b> GAACGAACTTGTGACACCT                                    |
| Foxp2-3'UTR (last 2Kb) reverse  | GCAT <b>GAATTC</b> CAGAGGTAGAAGCTTTCAGAAAG                                |
| Foxp2 ORF forward               | ATGCG <b>CTAGCT</b> TATTAAGTCATGATGCAGGAATC                               |
| Foxp2 ORF reverse               | GCAT <b>GAATTC</b> GTTCTCATTCCAGGTCCTCA                                   |
| Foxp4 ORF forward               | ATG <b>GCTAGC</b> GGCAATGATGGTGGAG                                        |
| Foxp4 ORF forward               | CGTAG <b>GAATTC</b> TGCCCTTAGGACATGTCCTC                                  |

CLOVIS *et al.*, Table S1
